# Supplementary material for: Insights into Enhanced Capacitive Behavior of Carbon Cathode for Lithium Ion Capacitors: The Coupling of Pore Size and Graphitization Engineering
Source: PubMed Central journal article supplement (PMC7770892; doi:10.1007/s40820-020-00458-6), 2020-06-06
Supplement: 40820_2020_458_MOESM1_ESM.pdf [file 40820_2020_458_MOESM1_ESM.pdf]

Supporting Information for

## Insights into Enhanced Capacitive Behavior of Carbon Cathode for Lithium Ion Capacitors: The Coupling of Pore Size and Graphitization Engineering

Kangyu Zou<sup>1</sup>, Peng Cai<sup>1</sup>, Baowei Wang<sup>1</sup>, Cheng Liu<sup>1</sup>, Jiayang Li<sup>1</sup>, Tianyun Qiu<sup>1</sup>, Guoqiang Zou<sup>1,\*</sup>, Hongshuai Hou<sup>1</sup>, Xiaobo Ji<sup>1,2</sup>

<sup>1</sup>College of Chemistry and Chemical Engineering, Central South University, Changsha 410083, People's Republic of China

<sup>2</sup>College of Metallurgy and Chemical Engineering, Jiangxi University of Science and Technology, 86 Hongqi Road, Ganzhou 341000, People's Republic of China

\*Corresponding author. E-mail: [gq-zou@csu.edu.cn](mailto:gq-zou@csu.edu.cn) (Guoqiang Zou)

### Supplementary Figures and Tables

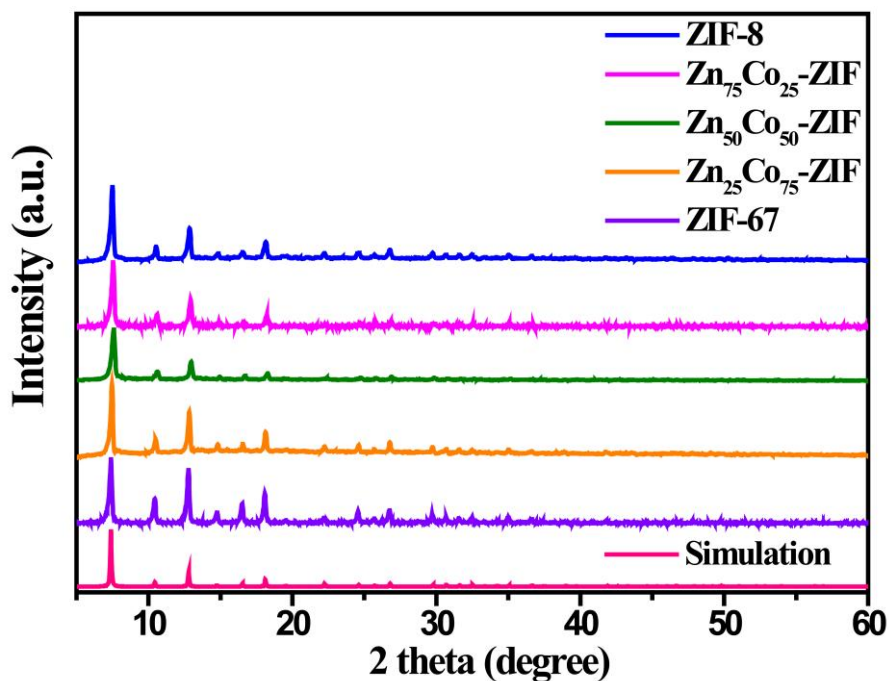

Fig. S1 Simulated and experimental XRD patterns of Zn<sub>x</sub>Co<sub>100-x</sub>-ZIFs

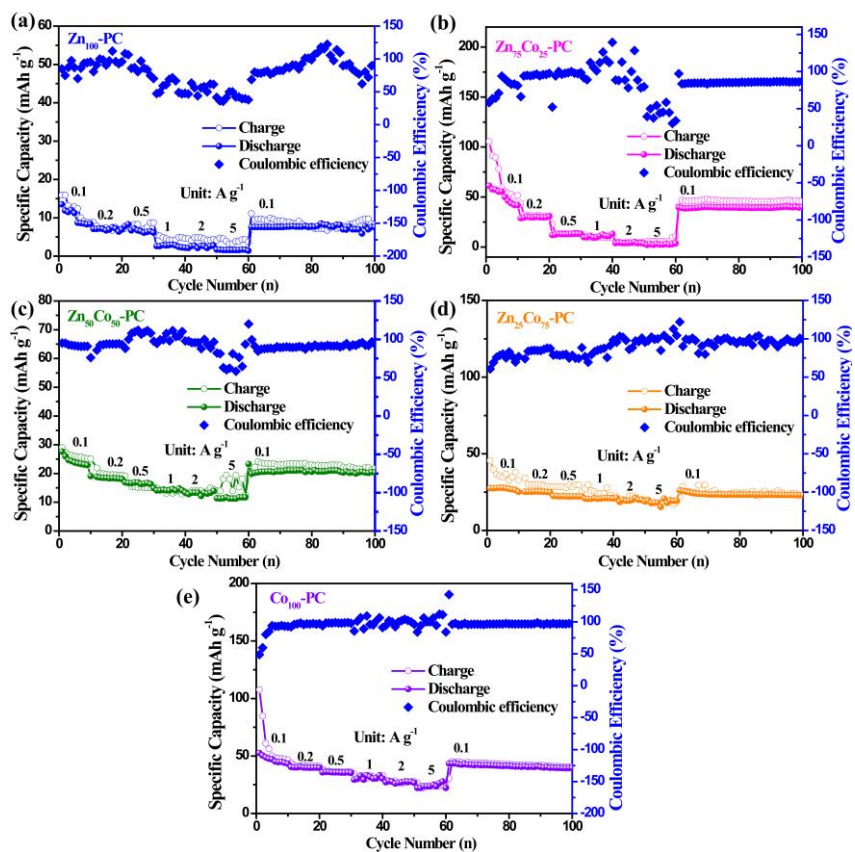

Fig. S2 The coulombic efficiencies of the Zn<sub>x</sub>Co<sub>100-x</sub>-PCs

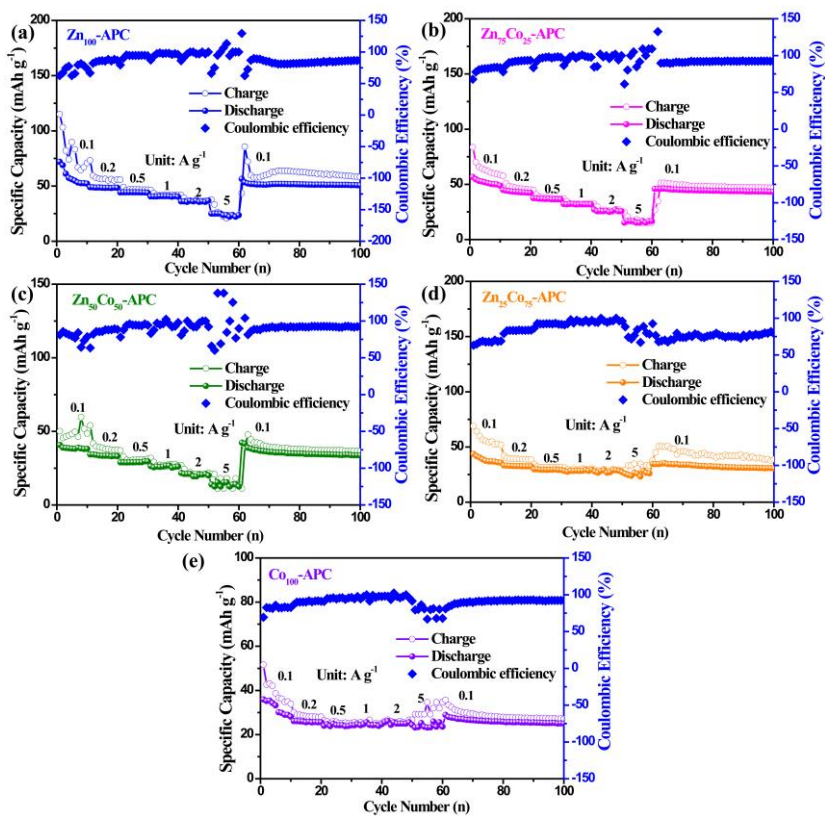

Fig. S3 The coulombic efficiencies of the Zn<sub>x</sub>Co<sub>100-x</sub>-APCs

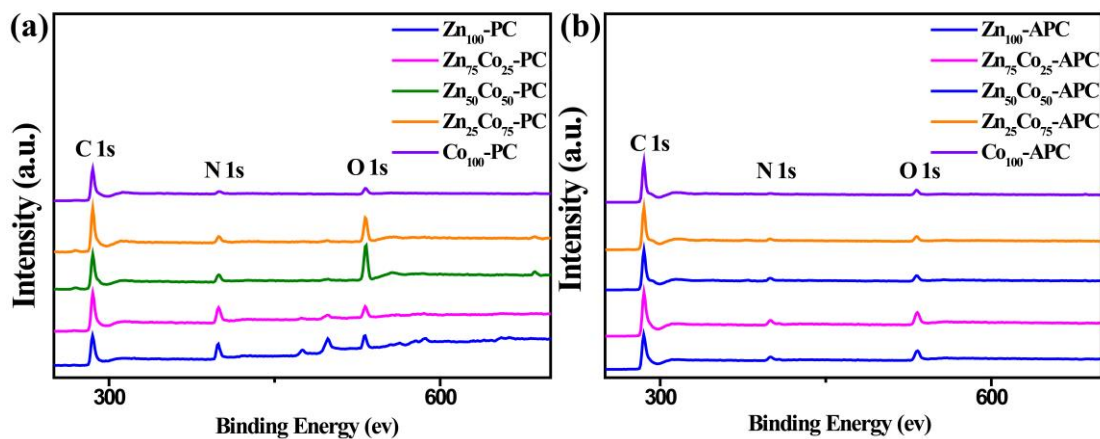

**Fig. S4** XPS survey spectra of the of  $Zn_xCo_{100-x}$ -PCs and  $Zn_xCo_{100-x}$ -APCs

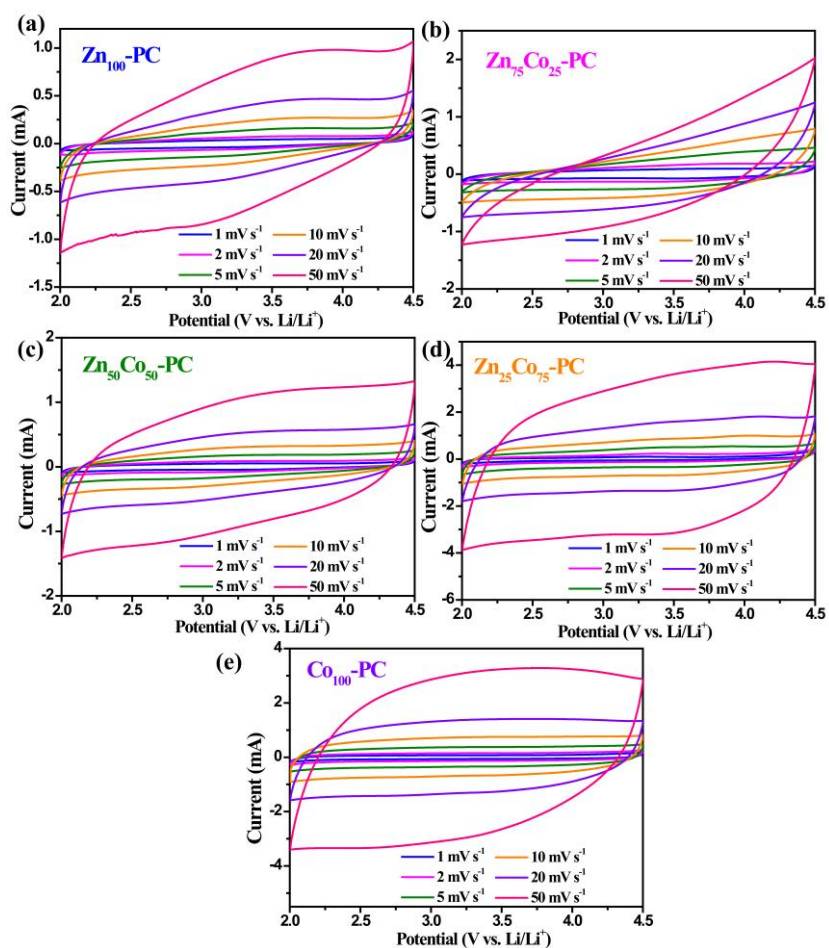

**Fig. S5** CV curves of (a)  $Zn_{100}$ -PC, (b)  $Zn_{75}Co_{25}$ -PC, (c)  $Zn_{50}Co_{50}$ -PC, (d)  $Zn_{25}Co_{75}$ -PC and (e)  $Co_{100}$ -PC cathodes at various scan rates from 1 to  $50 \text{ mV s}^{-1}$

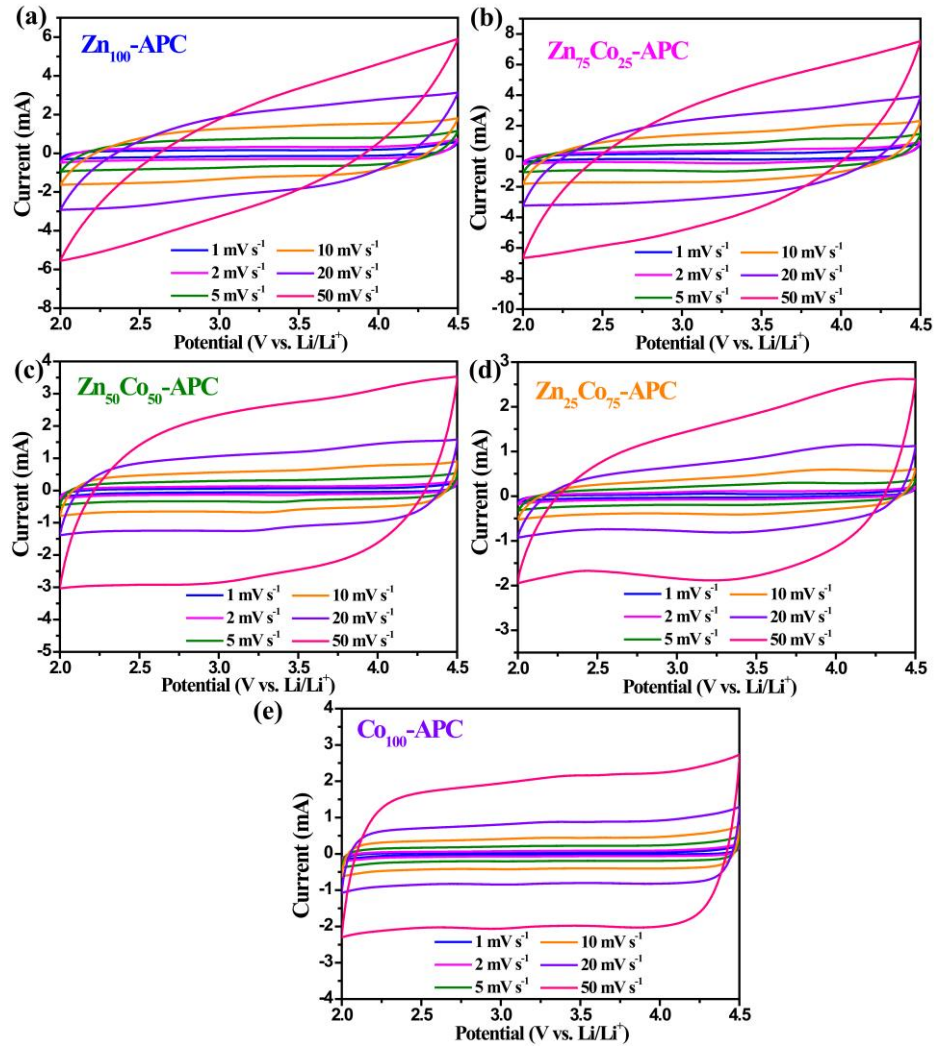

**Fig. S6** CV curves of (a) Zn<sub>100</sub>-APC, (b) Zn<sub>75</sub>Co<sub>25</sub>-APC, (c) Zn<sub>50</sub>Co<sub>50</sub>-APC, (d) Zn<sub>25</sub>Co<sub>75</sub>-APC and (e) Co<sub>100</sub>-APC cathodes at various scan rates from 1 to 50 mV s<sup>-1</sup>

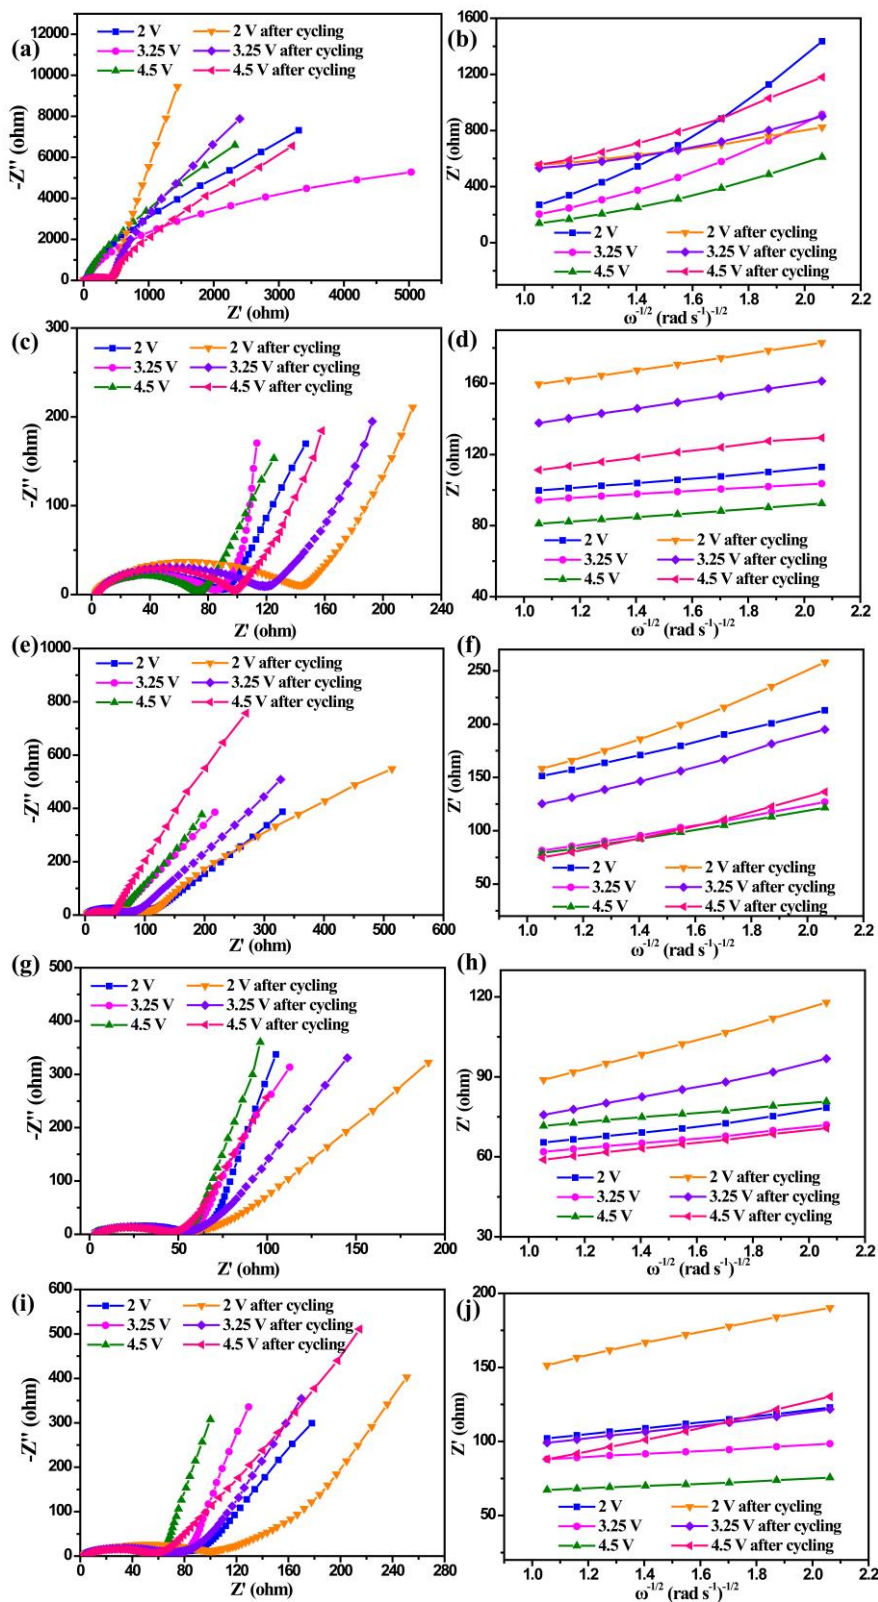

**Fig. S7** Nyquist plots and relationships of  $Z'$  and  $\omega^{-1/2}$  in the low frequency region of (a, b)  $\text{Zn}_{100}\text{-PC}$ , (c, d)  $\text{Zn}_{75}\text{Co}_{25}\text{-PC}$ , (e, f)  $\text{Zn}_{50}\text{Co}_{50}\text{-PC}$ , (g, h)  $\text{Zn}_{25}\text{Co}_{75}\text{-PC}$ , (i, j)  $\text{Co}_{100}\text{-PC}$

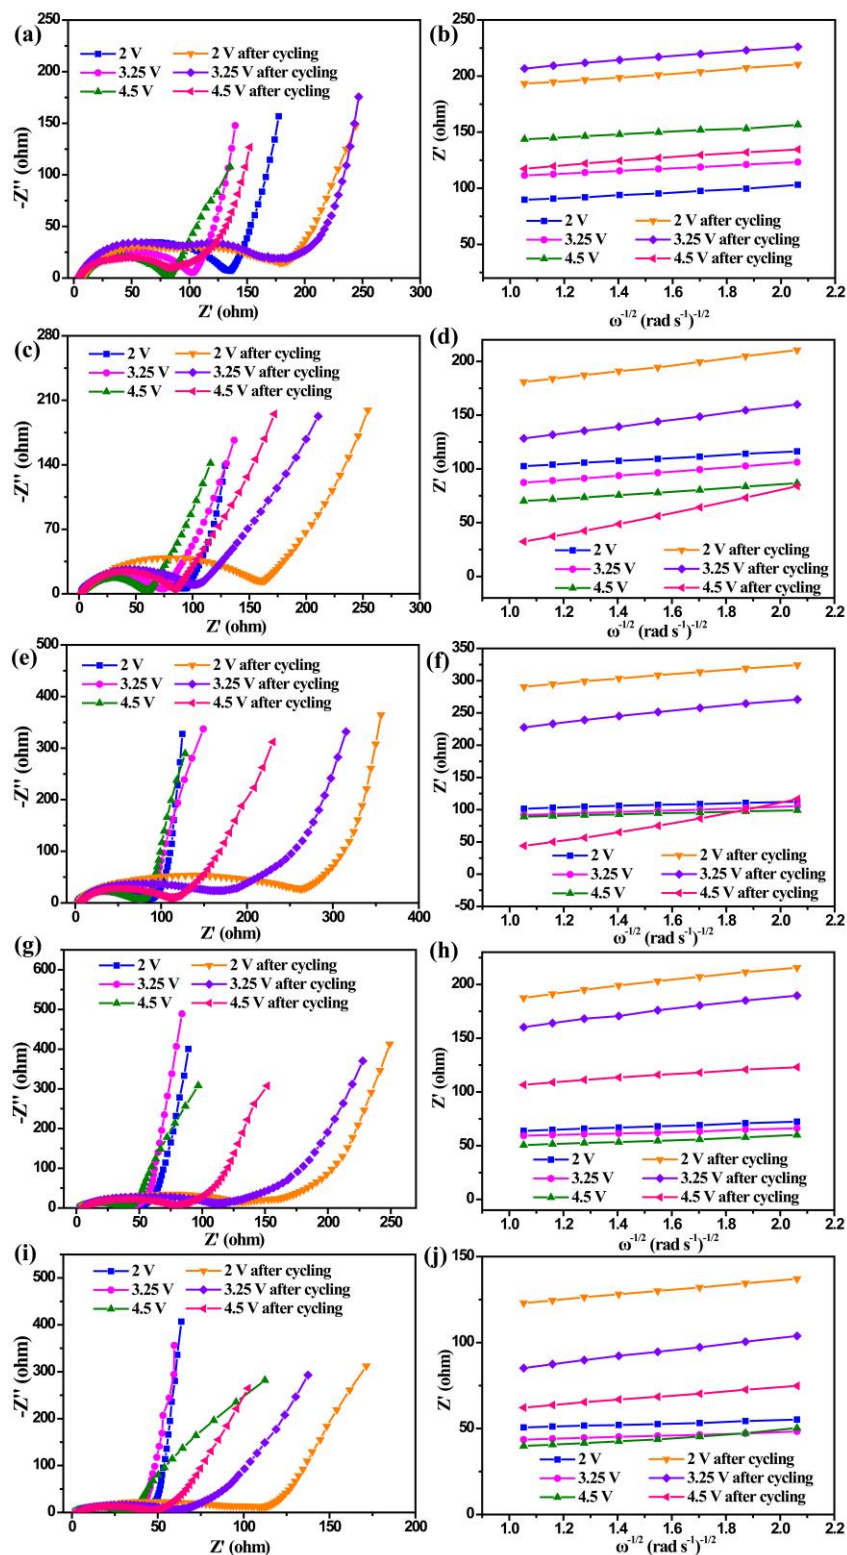

**Fig. S8** Nyquist plots and relationships of  $Z'$  and  $\omega^{-1/2}$  in the low frequency region of (a, b)  $\text{Zn}_{100}\text{-APC}$ , (c, d)  $\text{Zn}_{75}\text{Co}_{25}\text{-APC}$ , (e, f)  $\text{Zn}_{50}\text{Co}_{50}\text{-APC}$ , (g, h)  $\text{Zn}_{25}\text{Co}_{75}\text{-APC}$ , (i, j)  $\text{Co}_{100}\text{-APC}$

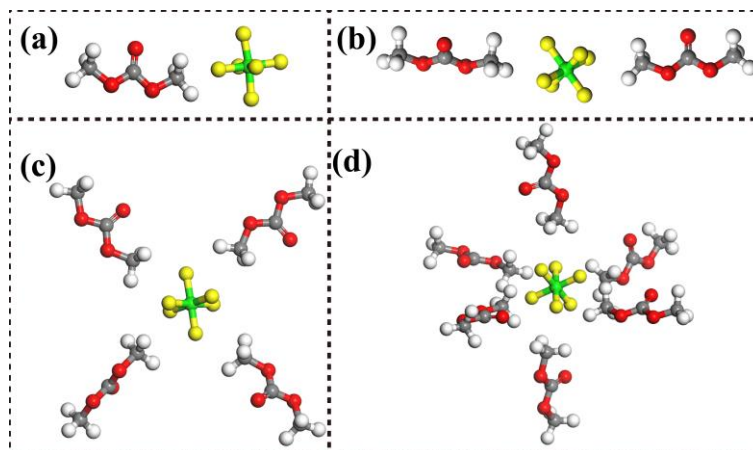

**Fig. S9** Optimized solvation structures of  $\text{PF}_6^-(\text{DMC})_i$  by DFT calculations: (a)  $\text{PF}_6^-(\text{DMC})_1$ , (b)  $\text{PF}_6^-(\text{DMC})_2$ , (c)  $\text{PF}_6^-(\text{DMC})_4$  and (d)  $\text{PF}_6^-(\text{DMC})_6$

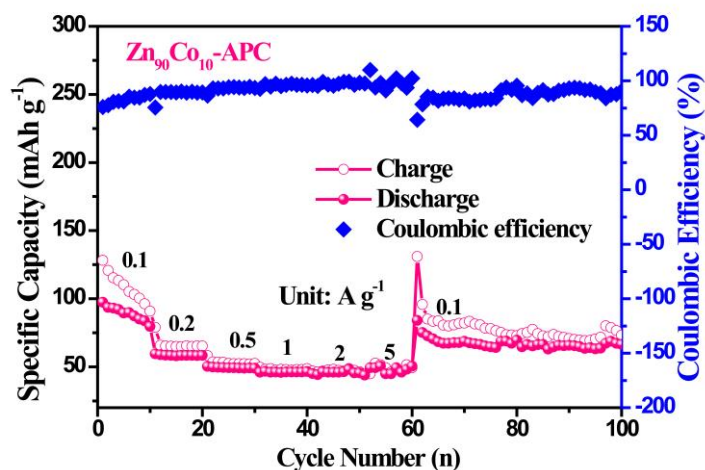

**Fig. S10** The coulombic efficiency of the  $\text{Zn}_{90}\text{Co}_{10}\text{-APC}$

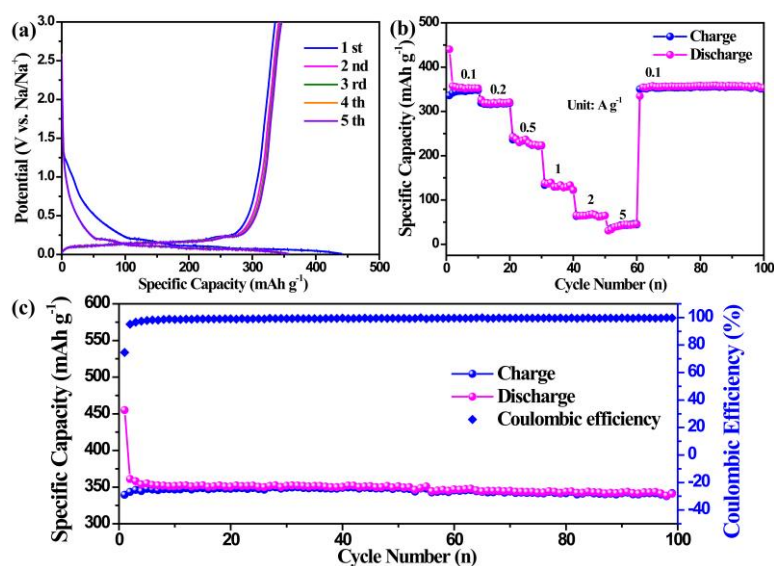

**Fig. S11** (a) GCD profiles at  $0.1 \text{ A g}^{-1}$ , (b) Rate capability at different current densities and (c) Cycling performance at  $0.1 \text{ A g}^{-1}$  of commercialize graphite anode

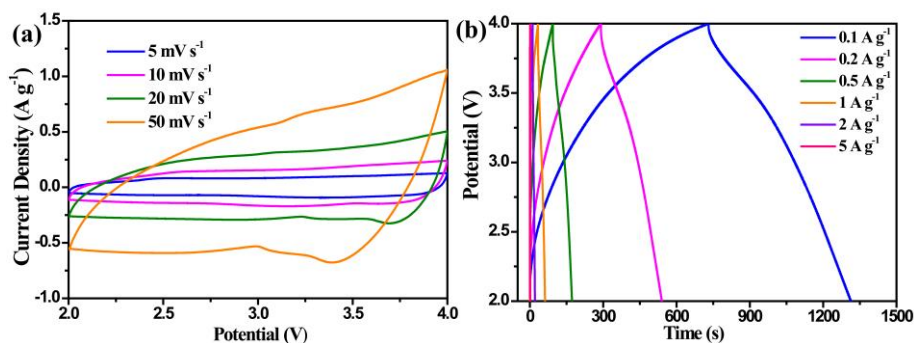

**Fig. S12** (a) CV curves and (b) GCD profiles of PLG//AC LIC

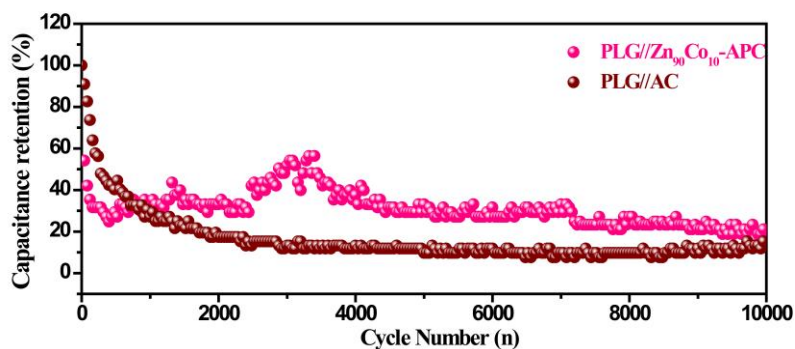

**Fig. S13** Cycling stability of PLG//Zn<sub>90</sub>Co<sub>10</sub>-APC and PLG//AC LICs at 1 A g<sup>-1</sup> for 10000 cycles within 2-4.0 V.

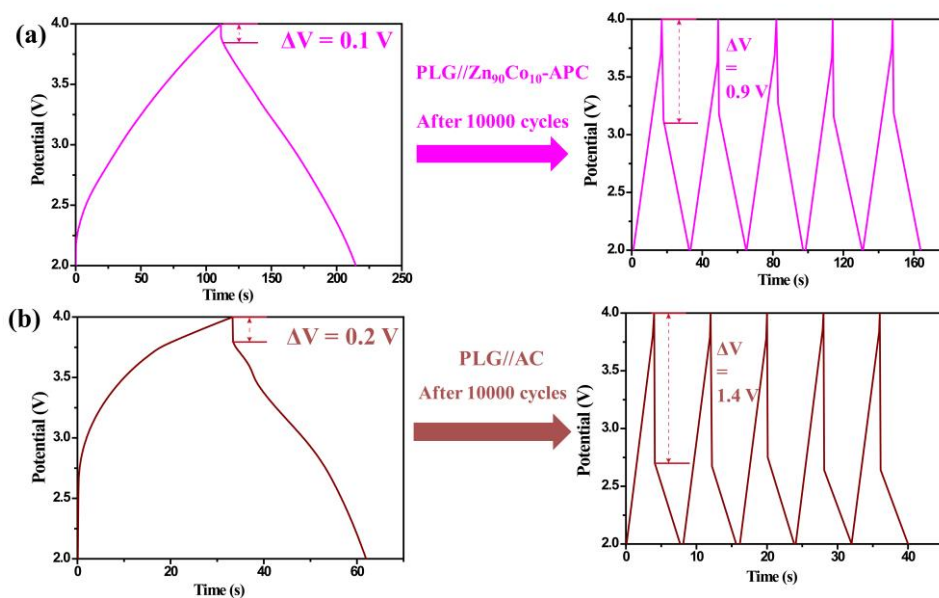

**Fig. S14** Comparison of potential drops for PLG//Zn<sub>90</sub>Co<sub>10</sub>-APC and PLG//AC LICs during the cyclic process



**Table S1** XPS elemental contents of  $Zn_xCo_{100-x}$ -PCs and  $Zn_xCo_{100-x}$ -APCs

| Sample                                 | C (at%) | N (at%) | O (at%) |
|----------------------------------------|---------|---------|---------|
| Zn <sub>100</sub> -PC                  | 67.93   | 20.59   | 11.48   |
| Zn <sub>75</sub> Co <sub>25</sub> -PC  | 70.94   | 19.43   | 9.62    |
| Zn <sub>50</sub> Co <sub>50</sub> -PC  | 64.99   | 9.95    | 25.06   |
| Zn <sub>25</sub> Co <sub>75</sub> -PC  | 75.04   | 8.69    | 16.27   |
| Co <sub>100</sub> -PC                  | 86.55   | 6.29    | 7.16    |
| Zn <sub>100</sub> -APC                 | 81.49   | 7.47    | 10.59   |
| Zn <sub>75</sub> Co <sub>25</sub> -APC | 84.28   | 6.34    | 9.38    |
| Zn <sub>50</sub> Co <sub>50</sub> -APC | 87.32   | 5.85    | 6.83    |
| Zn <sub>25</sub> Co <sub>75</sub> -APC | 89.22   | 4.64    | 6.14    |
| Co <sub>100</sub> -APC                 | 90.60   | 3.19    | 6.21    |

**Table S2** The specific calculated values of solvation energies of  $PF_6^-(EC)_i$  ( $i = 1, 2, 4, 6$ ) structures

| $i$ | $\Delta E_{solv}$ (kcal mol <sup>-1</sup> ) |
|-----|---------------------------------------------|
| 1   | -15.4672                                    |
| 2   | -26.9473                                    |
| 4   | -55.0242                                    |
| 6   | -71.8422                                    |

**Table S3** The specific calculated values of solvation energies of  $PF_6^-(DMC)_i$  ( $i = 1, 2, 4, 6$ ) structures

| $i$ | $\Delta E_{solv}$ (kcal mol <sup>-1</sup> ) |
|-----|---------------------------------------------|
| 1   | -6.7610                                     |
| 2   | -12.9980                                    |
| 4   | -26.1158                                    |
| 6   | -39.4399                                    |
